# Supplementary material
Source: MDPI journal article supplement (https://www.mdpi.com/2673-8007/4/3/75)
Supplement: s1 [file s1]

**Table S1.** Aerial and root dry biomass at 90 dat based on the interactions of the two study factors

| FACTOR 1. Microbial Inoculation                          | FACTOR 2. Organic amendment application | Aerial dry biomass (g)     | Root dry biomass (g)      |
|----------------------------------------------------------|-----------------------------------------|----------------------------|---------------------------|
| Withou Microbial inoculation (WM)                        | Without amendments (WA)                 | 7.04 ± 1.04 <sup>bc</sup>  | 1.52 ± 0.13 <sup>ab</sup> |
|                                                          | Compost (C)                             | 10.35 ± 0.82 <sup>ab</sup> | 1.55 ± 0.05 <sup>ab</sup> |
|                                                          | Manure (M)                              | 5.47 ± 0.97 <sup>c</sup>   | 1.30 ± 0.18 <sup>ab</sup> |
| <i>Trichoderma</i> sp. (T)                               | Without amendments (WA)                 | 8.44 ± 1.79 <sup>abc</sup> | 1.56 ± 0.38 <sup>ab</sup> |
|                                                          | Compost (C)                             | 8.80 ± 1.63 <sup>abc</sup> | 1.68 ± 0.47 <sup>ab</sup> |
|                                                          | Manure (M)                              | 7.53 ± 1.05 <sup>abc</sup> | 1.15 ± 0.15 <sup>b</sup>  |
| <i>Pseudomonas putida</i> (P)                            | Without amendments (WA)                 | 8.17 ± 2.02 <sup>abc</sup> | 1.24 ± 0.17 <sup>ab</sup> |
|                                                          | Compost (C)                             | 7.80 ± 0.64 <sup>abc</sup> | 1.28 ± 0.23 <sup>ab</sup> |
|                                                          | Manure (M)                              | 8.26 ± 2.22 <sup>abc</sup> | 1.67 ± 0.43 <sup>ab</sup> |
| <i>Trichoderma</i> sp. + <i>Pseudomonas putida</i> (T+P) | Without amendments (WA)                 | 8.31 ± 0.03 <sup>abc</sup> | 1.22 ± 0.04 <sup>ab</sup> |
|                                                          | Compost (C)                             | 11.19 ± 1.47 <sup>a</sup>  | 1.88 ± 0.18 <sup>a</sup>  |
|                                                          | Manure (M)                              | 9.80 ± 0.56 <sup>ab</sup>  | 1.54 ± 0.28 <sup>ab</sup> |

Means with different letters in the same column are statistically different (LSD Fisher,  $\alpha = 0.05$ )
